# Supplementary material for: Cervical cancer screening among English- and Spanish-speaking Hispanic women in an urban safety net health system, 2015–2020
Source: Springer Nature journal article supplement (doi:10.1186/s12905-023-02448-3), 2023-06-15
Supplement: MOESM1 [file 25490624]

## SUPPLEMENTARY MATERIALS

### **Cervical cancer screening among English- and Spanish-speaking Hispanic women in an urban safety net health system, 2015-2020**

Trisha L. Amboree <sup>1,2</sup>, Susan Lackey Parker <sup>1,2,3</sup>, Shaun Bulsara <sup>3</sup>, Matthew L. Anderson <sup>4</sup>,  
Kathleen M. Schmeler <sup>5</sup>, Elizabeth Y. Chiao <sup>6</sup>, Jane R. Montealegre <sup>1,2,3</sup>

<sup>1</sup> The University of Texas MD Anderson Cancer Center, Department of Behavioral Science,  
Houston, Texas, USA

<sup>2</sup> Baylor College of Medicine, Department of Pediatrics, Houston, Texas, USA

<sup>3</sup> Dan L. Duncan Comprehensive Cancer Center, Baylor College of Medicine, Houston, Texas,  
USA

<sup>4</sup> University of South Florida Morsani School of Medicine and Tampa General Hospital Cancer  
Institute, Division of Gynecologic Oncology, Tampa, Florida, USA

<sup>5</sup> The University of Texas MD Anderson Cancer Center, Department of Gynecologic Oncology  
and Reproductive Medicine, Houston, Texas, USA

<sup>6</sup> The University of Texas MD Anderson Cancer Center, Departments of Epidemiology and  
Medical Oncology, Houston, Texas, USA

#### **Corresponding author:**

Trisha L. Amboree, PhD, MPH  
The University of Texas MD Anderson Cancer Center  
1515 Holcombe Blvd., Unit 1330, Houston, TX 77030  
Tel: 713- 563-6079  
Email: TLAmboree@mdanderson.org

**Supplementary Table 1. Description of Terms**

|                           | Description                                                                                                                                                                                                                                                                                                                                                                       |
|---------------------------|-----------------------------------------------------------------------------------------------------------------------------------------------------------------------------------------------------------------------------------------------------------------------------------------------------------------------------------------------------------------------------------|
| Safety net health system  | United States (U.S.) healthcare settings that provide health care to vulnerable populations regardless of their ability to pay or their insurance coverage. The specific safety net referenced in this study provides care to a largely uninsured population made up of mostly non-White individuals (i.e., Hispanic, African American, Asian, and other).                        |
| Private insurance         | Also called commercial health insurance, this is health coverage that is issued by a private U.S. company or entity (i.e., non-government company) to U.S. nationals, citizens, permanent residents, or legal aliens.                                                                                                                                                             |
| Indigent/county insurance | Health insurance plans within the safety net health system that are available to low-income county residents. The cost to the patient is based on their annual household income (i.e., if income is higher, the cost may be higher and vice versa). These health plans are also provided to patients regardless of immigration status (i.e., regardless of U.S. resident status). |
| Medicaid                  | U.S. government health insurance coverage offered to low-income or very low-income U.S. nationals, citizens, permanent residents, or legal aliens, who are also legal residents of their state and need health insurance assistance.                                                                                                                                              |
| Medicare                  | U.S. government health insurance coverage offered to low-income U.S. nationals, citizens, permanent residents, or legal aliens, who are aged 65 years or older and need health insurance assistance.                                                                                                                                                                              |
| No insurance/self-pay     | Patients with no health insurance coverage who are required to pay for their medical expenses out-of-pocket.                                                                                                                                                                                                                                                                      |

## References:

1. Topic: Safety Net. Agency for Healthcare Research and Quality. U.S. Department of Health and Human Services. Accessed April 6, 2023. <https://www.ahrq.gov/topics/safety-net.html#:~:text=Safety%20net%20practices%20are%20defined%20by%20the%20Institute,services%20to%20uninsured%2C%20Medicaid%20and%20other%20vulnerable%20patients.%22>
2. Texas Health Insurance. Texas.gov. Texas Department of Insurance. Accessed April 10, 2023. <https://www.texas.gov/health-services/texas-health-insurance/>
3. County Indigent Health Care Program. Texas Health and Human Services. Accessed April 10, 2023. <https://www.hhs.texas.gov/services/health/county-indigent-health-care-program#:~:text=The%20County%20Indigent%20Health%20Care,preventative%20and%20some%20specialty%20services.>



|                                                                                                                                       |        |        |        |        |        |        |        |        |        |        |        |        |
|---------------------------------------------------------------------------------------------------------------------------------------|--------|--------|--------|--------|--------|--------|--------|--------|--------|--------|--------|--------|
| <i>Medicare vs. Other</i>                                                                                                             | <.0001 | <.0001 | 0.0181 | 0.1085 | 0.0041 | 0.0246 | <.0001 | <.0001 | <.0001 | <.0001 | 0.0240 | 0.1441 |
| <i>No insurance/self-pay vs. Other</i>                                                                                                | <.0001 | <.0001 | 0.0085 | 0.0512 | <.0001 | <.0001 | <.0001 | <.0001 | 0.0197 | 0.1182 | <.0001 | <.0001 |
| Tobacco use                                                                                                                           |        |        |        |        |        |        |        |        |        |        |        |        |
| <i>Current vs. Former</i>                                                                                                             | <.0001 | <.0001 | 0.1132 | 0.6793 | 0.0389 | 0.2336 | <.0001 | <.0001 | 0.0018 | 0.0105 | 0.0081 | 0.0483 |
| <i>Current vs. Never</i>                                                                                                              | <.0001 | <.0001 | <.0001 | <.0001 | <.0001 | <.0001 | <.0001 | <.0001 | <.0001 | <.0001 | <.0001 | <.0001 |
| <i>Former vs. Never</i>                                                                                                               | <.0001 | <.0001 | <.0001 | <.0001 | <.0001 | <.0001 | <.0001 | <.0001 | <.0001 | <.0001 | <.0001 | <.0001 |
| Screening status                                                                                                                      |        |        |        |        |        |        |        |        |        |        |        |        |
| <i>UTD vs. Not UTD</i>                                                                                                                | <.0001 | <.0001 | 0.0002 | 0.0011 | <.0001 | <.0001 | <.0001 | <.0001 | <.0001 | <.0001 | <.0001 | <.0001 |
| Raw p-value is based on post-hoc pairwise comparison using chi-square testing.<br>Adjusted p-value is based on Bonferroni correction. |        |        |        |        |        |        |        |        |        |        |        |        |

**Supplementary Table 3. Post-hoc analyses assessing pairwise comparisons of omnibus testing presented in Table 2.**

| Characteristic                                                                                                                     | Screening status       |              |
|------------------------------------------------------------------------------------------------------------------------------------|------------------------|--------------|
|                                                                                                                                    | <i>UTD vs. Not UTD</i> |              |
|                                                                                                                                    | Raw p-value            | Adj. p-value |
| Age, years (mean, SD)                                                                                                              | 0.0538                 | ---          |
| Language-use group                                                                                                                 |                        |              |
| <i>English- vs. Spanish-speaking Hispanic</i>                                                                                      | <.0001                 | <.0001       |
| Insurance                                                                                                                          |                        |              |
| <i>Private vs. Indigent/County</i>                                                                                                 | <.0001                 | <.0001       |
| <i>Private vs. Medicaid</i>                                                                                                        | <.0001                 | <.0001       |
| <i>Private vs. Medicare</i>                                                                                                        | 0.0021                 | 0.0311       |
| <i>Private vs. No insurance/self-pay</i>                                                                                           | <.0001                 | <.0001       |
| <i>Private vs. Other</i>                                                                                                           | 0.0002                 | 0.0027       |
| <i>Indigent/County vs. Medicaid</i>                                                                                                | <.0001                 | <.0001       |
| <i>Indigent/County vs. Medicare</i>                                                                                                | <.0001                 | <.0001       |
| <i>Indigent/County vs. No insurance/self-pay</i>                                                                                   | <.0001                 | <.0001       |
| <i>Indigent/County vs. Other</i>                                                                                                   | <.0001                 | <.0001       |
| <i>Medicaid vs. Medicare</i>                                                                                                       | 0.0041                 | 0.0612       |
| <i>Medicaid vs. No insurance/self-pay</i>                                                                                          | 0.0059                 | 0.0878       |
| <i>Medicaid vs. Other</i>                                                                                                          | 0.0348                 | 0.5224       |
| <i>Medicare vs. No insurance/self-pay</i>                                                                                          | 0.0822                 | 1.0000       |
| <i>Medicare vs. Other</i>                                                                                                          | 0.5912                 | 1.0000       |
| <i>No insurance/self-pay vs. Other</i>                                                                                             | 0.3350                 | 1.0000       |
| Tobacco use                                                                                                                        |                        |              |
| <i>Current vs. Former</i>                                                                                                          | 0.2492                 | 0.7477       |
| <i>Current vs. Never</i>                                                                                                           | 0.2171                 | 0.6513       |
| <i>Former vs. Never</i>                                                                                                            | 0.0004                 | 0.0013       |
| Raw p-value is based on post-hoc pairwise comparison using chi-square testing. Adjusted p-value is based on Bonferroni correction. |                        |              |
